# Supplementary material for: Sensory restoration by epidural stimulation of the lateral spinal cord in upper-limb amputees
Source: eLife. 2020 Jul 21;9:e54349. doi: 10.7554/eLife.54349 (PMC7373432; doi:10.7554/eLife.54349)
Supplement: Figure 3—source data 1. [file elife-54349-fig3-data1.csv]

	mech	move	tingle	subject	count	category
0	no mechanical	across skin	tingle	Subject 1	2	mixed
1	no mechanical	body/limb/joint	tingle	Subject 1	3	mixed
2	no mechanical	no movement	tingle	Subject 1	510	paresthesia
3	no mechanical	vibration	no tingle	Subject 1	6	natural
4	no mechanical	vibration	tingle	Subject 1	39	mixed
5	pressure	no movement	tingle	Subject 1	1	mixed
6	sharp	body/limb/joint	tingle	Subject 1	1	mixed
7	sharp	no movement	no tingle	Subject 1	63	natural
8	sharp	no movement	tingle	Subject 1	128	mixed
9	sharp	vibration	no tingle	Subject 1	3	natural
10	sharp	vibration	tingle	Subject 1	2	mixed
11	touch	vibration	no tingle	Subject 1	2	natural
12	touch	vibration	tingle	Subject 1	1	mixed
13	no mechanical	across skin	tingle	Subject 2	1	mixed
14	no mechanical	body/limb/joint	no tingle	Subject 2	4	natural
15	no mechanical	body/limb/joint	tingle	Subject 2	3	mixed
16	no mechanical	no movement	tingle	Subject 2	31	paresthesia
17	no mechanical	vibration	no tingle	Subject 2	39	natural
18	no mechanical	vibration	tingle	Subject 2	49	mixed
19	pressure	across skin	tingle	Subject 2	3	mixed
20	pressure	body/limb/joint	no tingle	Subject 2	2	natural
21	pressure	body/limb/joint	tingle	Subject 2	9	mixed
22	pressure	no movement	no tingle	Subject 2	58	natural
23	pressure	no movement	tingle	Subject 2	225	mixed
24	pressure	vibration	no tingle	Subject 2	81	natural
25	pressure	vibration	tingle	Subject 2	127	mixed
26	sharp	across skin	no tingle	Subject 2	2	natural
27	sharp	across skin	tingle	Subject 2	4	mixed
28	sharp	body/limb/joint	no tingle	Subject 2	1	natural
29	sharp	body/limb/joint	tingle	Subject 2	7	mixed
30	sharp	no movement	no tingle	Subject 2	15	natural
31	sharp	no movement	tingle	Subject 2	130	mixed
32	sharp	vibration	no tingle	Subject 2	10	natural
33	sharp	vibration	tingle	Subject 2	104	mixed
34	touch	across skin	no tingle	Subject 2	1	natural
35	touch	no movement	no tingle	Subject 2	25	natural
36	touch	no movement	tingle	Subject 2	59	mixed
37	touch	vibration	no tingle	Subject 2	13	natural
38	touch	vibration	tingle	Subject 2	9	mixed
39	no mechanical	body/limb/joint	no tingle	Subject 3	7	natural
40	no mechanical	no movement	tingle	Subject 3	1	paresthesia
41	no mechanical	vibration	no tingle	Subject 3	1287	natural
42	no mechanical	vibration	tingle	Subject 3	463	mixed
43	pressure	no movement	no tingle	Subject 3	3	natural
44	pressure	vibration	no tingle	Subject 3	6	natural
45	touch	body/limb/joint	no tingle	Subject 3	1	natural
46	touch	no movement	no tingle	Subject 3	457	natural
47	touch	no movement	tingle	Subject 3	1	mixed
48	touch	vibration	no tingle	Subject 3	115	natural
49	touch	vibration	tingle	Subject 3	8	mixed
50	no mechanical	across skin	tingle	Subject 4	1	mixed
51	no mechanical	body/limb/joint	no tingle	Subject 4	4	natural
52	no mechanical	body/limb/joint	tingle	Subject 4	10	mixed
53	no mechanical	no movement	tingle	Subject 4	4	paresthesia
54	no mechanical	vibration	no tingle	Subject 4	4	natural
55	no mechanical	vibration	tingle	Subject 4	21	mixed
56	pressure	across skin	no tingle	Subject 4	1	natural
57	pressure	across skin	tingle	Subject 4	4	mixed
58	pressure	body/limb/joint	no tingle	Subject 4	17	natural
59	pressure	body/limb/joint	tingle	Subject 4	110	mixed
60	pressure	no movement	no tingle	Subject 4	2	natural
61	pressure	no movement	tingle	Subject 4	2	mixed
62	pressure	vibration	no tingle	Subject 4	4	natural
63	pressure	vibration	tingle	Subject 4	531	mixed
64	sharp	body/limb/joint	no tingle	Subject 4	1	natural
65	sharp	body/limb/joint	tingle	Subject 4	30	mixed
66	sharp	no movement	no tingle	Subject 4	1	natural
67	sharp	vibration	no tingle	Subject 4	4	natural
68	sharp	vibration	tingle	Subject 4	255	mixed
69	touch	across skin	no tingle	Subject 4	1	natural
70	touch	across skin	tingle	Subject 4	1	mixed
71	touch	body/limb/joint	no tingle	Subject 4	4	natural
72	touch	body/limb/joint	tingle	Subject 4	12	mixed
73	touch	no movement	no tingle	Subject 4	1	natural
74	touch	no movement	tingle	Subject 4	1	mixed
75	touch	vibration	no tingle	Subject 4	4	natural
76	touch	vibration	tingle	Subject 4	356	mixed
