# Supplementary material for: Sensory restoration by epidural stimulation of the lateral spinal cord in upper-limb amputees
Source: eLife. 2020 Jul 21;9:e54349. doi: 10.7554/eLife.54349 (PMC7373432; doi:10.7554/eLife.54349)
Supplement: Figure 4—figure supplement 2—source data 1. [file elife-54349-fig4-figsupp2-data1.csv]

	stimulation amplitude	electrode	reported magnitude	subject	amplitude bin	magnitude bin	normalized magnitude
15	4	05::04:21:22:23 (1:1:1:2)	4	3	size2	size2	0.375
16	4	05::04:21:22:23 (1:1:1:2)	3	3	size2	size1	0.25
17	4	05::04:21:22:23 (1:1:1:2)	3	3	size2	size1	0.25
18	4	05::04:21:22:23 (1:1:1:2)	1	3	size2	size0	0
19	4	05::04:21:22:23 (1:1:1:2)	4	3	size2	size2	0.375
20	6	05::04:21:22:23 (1:1:1:2)	6	3	size4	size3	0.625
21	6	05::04:21:22:23 (1:1:1:2)	6	3	size4	size3	0.625
22	6	05::04:21:22:23 (1:1:1:2)	7	3	size4	size4	0.75
23	6	05::04:21:22:23 (1:1:1:2)	4	3	size4	size2	0.375
24	6	05::04:21:22:23 (1:1:1:2)	7	3	size4	size4	0.75
25	5	05::04:21:22:23 (1:1:1:2)	4	3	size3	size2	0.375
26	5	05::04:21:22:23 (1:1:1:2)	4	3	size3	size2	0.375
27	5	05::04:21:22:23 (1:1:1:2)	4	3	size3	size2	0.375
28	5	05::04:21:22:23 (1:1:1:2)	7	3	size3	size4	0.75
29	5	05::04:21:22:23 (1:1:1:2)	7.9	3	size3	size4	0.8625
30	2	05::04:21:22:23 (1:1:1:2)	1	3	size0	size0	0
31	2	05::04:21:22:23 (1:1:1:2)	1	3	size0	size0	0
32	2	05::04:21:22:23 (1:1:1:2)	1	3	size0	size0	0
33	2	05::04:21:22:23 (1:1:1:2)	1	3	size0	size0	0
34	2	05::04:21:22:23 (1:1:1:2)	1	3	size0	size0	0
35	3	05::04:21:22:23 (1:1:1:2)	2	3	size1	size0	0.125
36	3	05::04:21:22:23 (1:1:1:2)	2	3	size1	size0	0.125
37	3	05::04:21:22:23 (1:1:1:2)	2	3	size1	size0	0.125
38	3	05::04:21:22:23 (1:1:1:2)	2	3	size1	size0	0.125
39	3	05::04:21:22:23 (1:1:1:2)	2	3	size1	size0	0.125
70	2	05::04:06 (1:1)	1	3	size0	size0	0.1998
71	2	05::04:06 (1:1)	3	3	size0	size2	0.5998
72	2	05::04:06 (1:1)	0	3	size0	size0	-0.0002
73	2	05::04:06 (1:1)	0	3	size0	size0	-0.0002
74	2	05::04:06 (1:1)	0	3	size0	size0	-0.0002
75	2	05::04:06 (1:1)	0	3	size0	size0	-0.0002
76	2	05::04:06 (1:1)	0	3	size0	size0	-0.0002
77	2	05::04:06 (1:1)	0	3	size0	size0	-0.0002
78	2	05::04:06 (1:1)	0	3	size0	size0	-0.0002
79	2	05::04:06 (1:1)	0	3	size0	size0	-0.0002
80	5	05::04:06 (1:1)	4	3	size3	size3	0.7998
81	5	05::04:06 (1:1)	4.9	3	size3	size4	0.9798
82	5	05::04:06 (1:1)	4.9	3	size3	size4	0.9798
83	5	05::04:06 (1:1)	4	3	size3	size3	0.7998
84	5	05::04:06 (1:1)	3	3	size3	size2	0.5998
85	5	05::04:06 (1:1)	2	3	size3	size1	0.3998
86	5	05::04:06 (1:1)	2	3	size3	size1	0.3998
87	5	05::04:06 (1:1)	4	3	size3	size3	0.7998
88	5	05::04:06 (1:1)	3	3	size3	size2	0.5998
89	5	05::04:06 (1:1)	3	3	size3	size2	0.5998
90	6	05::04:06 (1:1)	4.9	3	size4	size4	0.9798
91	6	05::04:06 (1:1)	4	3	size4	size3	0.7998
92	6	05::04:06 (1:1)	4.9	3	size4	size4	0.9798
93	6	05::04:06 (1:1)	4.9	3	size4	size4	0.9798
94	6	05::04:06 (1:1)	3	3	size4	size2	0.5998
95	6	05::04:06 (1:1)	3	3	size4	size2	0.5998
96	6	05::04:06 (1:1)	4	3	size4	size3	0.7998
97	6	05::04:06 (1:1)	4	3	size4	size3	0.7998
98	6	05::04:06 (1:1)	4.9	3	size4	size4	0.9798
99	6	05::04:06 (1:1)	4.9	3	size4	size4	0.9798
100	4	05::04:06 (1:1)	3	3	size2	size2	0.5998
101	4	05::04:06 (1:1)	4	3	size2	size3	0.7998
102	4	05::04:06 (1:1)	4	3	size2	size3	0.7998
103	4	05::04:06 (1:1)	3	3	size2	size2	0.5998
104	4	05::04:06 (1:1)	3	3	size2	size2	0.5998
105	4	05::04:06 (1:1)	2	3	size2	size1	0.3998
106	4	05::04:06 (1:1)	2	3	size2	size1	0.3998
107	4	05::04:06 (1:1)	2	3	size2	size1	0.3998
108	4	05::04:06 (1:1)	3	3	size2	size2	0.5998
109	4	05::04:06 (1:1)	2	3	size2	size1	0.3998
110	3	05::04:06 (1:1)	2	3	size1	size1	0.3998
111	3	05::04:06 (1:1)	2	3	size1	size1	0.3998
112	3	05::04:06 (1:1)	4	3	size1	size3	0.7998
113	3	05::04:06 (1:1)	2	3	size1	size1	0.3998
114	3	05::04:06 (1:1)	2	3	size1	size1	0.3998
115	3	05::04:06 (1:1)	2	3	size1	size1	0.3998
116	3	05::04:06 (1:1)	1	3	size1	size0	0.1998
117	3	05::04:06 (1:1)	1	3	size1	size0	0.1998
118	3	05::04:06 (1:1)	1	3	size1	size0	0.1998
119	3	05::04:06 (1:1)	1	3	size1	size0	0.1998
140	4.5	05::06:07 (1:1)	4	3	size2	size2	0.428571429
141	4.5	05::06:07 (1:1)	3	3	size2	size1	0.285714286
142	4.5	05::06:07 (1:1)	3	3	size2	size1	0.285714286
143	4.5	05::06:07 (1:1)	5	3	size2	size3	0.571428571
144	4.5	05::06:07 (1:1)	3	3	size2	size1	0.285714286
145	5.4	05::06:07 (1:1)	5	3	size3	size3	0.571428571
146	5.4	05::06:07 (1:1)	6.9	3	size3	size4	0.842857143
147	5.4	05::06:07 (1:1)	6.9	3	size3	size4	0.842857143
148	5.4	05::06:07 (1:1)	6	3	size3	size4	0.714285714
149	5.4	05::06:07 (1:1)	6	3	size3	size4	0.714285714
150	6	05::06:07 (1:1)	6	3	size4	size4	0.714285714
151	6	05::06:07 (1:1)	6.9	3	size4	size4	0.842857143
152	6	05::06:07 (1:1)	5	3	size4	size3	0.571428571
153	6	05::06:07 (1:1)	6.9	3	size4	size4	0.842857143
154	6	05::06:07 (1:1)	6.9	3	size4	size4	0.842857143
155	6	05::06:07 (1:1)	5	3	size4	size3	0.571428571
156	6	05::06:07 (1:1)	5	3	size4	size3	0.571428571
157	6	05::06:07 (1:1)	6	3	size4	size4	0.714285714
158	6	05::06:07 (1:1)	5	3	size4	size3	0.571428571
159	6	05::06:07 (1:1)	4	3	size4	size2	0.428571429
160	3	05::06:07 (1:1)	3	3	size0	size1	0.285714286
161	3	05::06:07 (1:1)	1	3	size0	size0	0
162	3	05::06:07 (1:1)	2	3	size0	size0	0.142857143
163	3	05::06:07 (1:1)	2	3	size0	size0	0.142857143
164	3	05::06:07 (1:1)	1	3	size0	size0	0
165	3.66	05::06:07 (1:1)	4	3	size1	size2	0.428571429
166	3.66	05::06:07 (1:1)	3	3	size1	size1	0.285714286
167	3.66	05::06:07 (1:1)	3	3	size1	size1	0.285714286
168	3.66	05::06:07 (1:1)	6	3	size1	size4	0.714285714
169	3.66	05::06:07 (1:1)	5	3	size1	size3	0.571428571
185	4.22	05::06 (1)	3	3	size2	size2	0.499833333
186	4.22	05::06 (1)	2	3	size2	size1	0.333166667
187	4.22	05::06 (1)	2	3	size2	size1	0.333166667
188	4.22	05::06 (1)	2	3	size2	size1	0.333166667
189	4.22	05::06 (1)	5	3	size2	size4	0.833166667
190	6	05::06 (1)	5.9	3	size4	size4	0.983166667
191	6	05::06 (1)	5.9	3	size4	size4	0.983166667
192	6	05::06 (1)	5.9	3	size4	size4	0.983166667
193	6	05::06 (1)	4	3	size4	size3	0.6665
194	6	05::06 (1)	4	3	size4	size3	0.6665
195	2.89	05::06 (1)	2	3	size1	size1	0.333166667
196	2.89	05::06 (1)	2	3	size1	size1	0.333166667
197	2.89	05::06 (1)	1	3	size1	size0	0.1665
198	2.89	05::06 (1)	1	3	size1	size0	0.1665
199	2.89	05::06 (1)	1	3	size1	size0	0.1665
200	2	05::06 (1)	1	3	size0	size0	0.1665
201	2	05::06 (1)	0	3	size0	size0	-0.000166667
202	2	05::06 (1)	0	3	size0	size0	-0.000166667
203	2	05::06 (1)	0	3	size0	size0	-0.000166667
204	2	05::06 (1)	0	3	size0	size0	-0.000166667
205	5.1	05::06 (1)	5	3	size3	size4	0.833166667
206	5.1	05::06 (1)	5	3	size3	size4	0.833166667
207	5.1	05::06 (1)	3	3	size3	size2	0.499833333
208	5.1	05::06 (1)	5.9	3	size3	size4	0.983166667
209	5.1	05::06 (1)	5	3	size3	size4	0.833166667
225	1.5	Unipolar: 06	1	3	size0	size0	0
226	1.5	Unipolar: 06	1	3	size0	size0	0
227	1.5	Unipolar: 06	1	3	size0	size0	0
228	1.5	Unipolar: 06	1	3	size0	size0	0
229	1.5	Unipolar: 06	1	3	size0	size0	0
230	6	Unipolar: 06	5	3	size4	size3	0.571428571
231	6	Unipolar: 06	6	3	size4	size4	0.714285714
232	6	Unipolar: 06	6	3	size4	size4	0.714285714
233	6	Unipolar: 06	6	3	size4	size4	0.714285714
234	6	Unipolar: 06	6	3	size4	size4	0.714285714
235	2.5	Unipolar: 06	2	3	size1	size0	0.142857143
236	2.5	Unipolar: 06	2	3	size1	size0	0.142857143
237	2.5	Unipolar: 06	3	3	size1	size1	0.285714286
238	2.5	Unipolar: 06	3	3	size1	size1	0.285714286
239	2.5	Unipolar: 06	3	3	size1	size1	0.285714286
240	5	Unipolar: 06	4	3	size3	size2	0.428571429
241	5	Unipolar: 06	5	3	size3	size3	0.571428571
242	5	Unipolar: 06	5	3	size3	size3	0.571428571
243	5	Unipolar: 06	6.9	3	size3	size4	0.842857143
244	5	Unipolar: 06	6.9	3	size3	size4	0.842857143
245	3.5	Unipolar: 06	3	3	size2	size1	0.285714286
246	3.5	Unipolar: 06	4	3	size2	size2	0.428571429
247	3.5	Unipolar: 06	4	3	size2	size2	0.428571429
248	3.5	Unipolar: 06	5	3	size2	size3	0.571428571
249	3.5	Unipolar: 06	3	3	size2	size1	0.285714286
265	2	Unipolar: 07	1	3	size0	size0	0.1665
266	2	Unipolar: 07	0	3	size0	size0	-0.000166667
267	2	Unipolar: 07	1	3	size0	size0	0.1665
268	2	Unipolar: 07	1	3	size0	size0	0.1665
269	2	Unipolar: 07	1	3	size0	size0	0.1665
270	4	Unipolar: 07	4	3	size2	size3	0.6665
271	4	Unipolar: 07	5	3	size2	size4	0.833166667
272	4	Unipolar: 07	4	3	size2	size3	0.6665
273	4	Unipolar: 07	4	3	size2	size3	0.6665
274	4	Unipolar: 07	5	3	size2	size4	0.833166667
275	3	Unipolar: 07	3	3	size1	size2	0.499833333
276	3	Unipolar: 07	2	3	size1	size1	0.333166667
277	3	Unipolar: 07	3	3	size1	size2	0.499833333
278	3	Unipolar: 07	1	3	size1	size0	0.1665
279	3	Unipolar: 07	5	3	size1	size4	0.833166667
280	5	Unipolar: 07	5.9	3	size3	size4	0.983166667
281	5	Unipolar: 07	4	3	size3	size3	0.6665
282	5	Unipolar: 07	4	3	size3	size3	0.6665
283	5	Unipolar: 07	5	3	size3	size4	0.833166667
284	5	Unipolar: 07	5.9	3	size3	size4	0.983166667
285	6	Unipolar: 07	5	3	size4	size4	0.833166667
286	6	Unipolar: 07	4	3	size4	size3	0.6665
287	6	Unipolar: 07	5.9	3	size4	size4	0.983166667
288	6	Unipolar: 07	5	3	size4	size4	0.833166667
289	6	Unipolar: 07	5.9	3	size4	size4	0.983166667
308	5.32	11::14 (1)	5	1	size2	size3	0.428571429
309	5.32	11::14 (1)	4	1	size2	size2	0.285714286
310	5.32	11::14 (1)	4	1	size2	size2	0.285714286
311	5.32	11::14 (1)	6	1	size2	size4	0.571428571
312	5.32	11::14 (1)	5	1	size2	size3	0.428571429
313	5.32	11::14 (1)	6	1	size2	size4	0.571428571
314	4.33	11::14 (1)	2	1	size0	size0	0
315	4.33	11::14 (1)	4	1	size0	size2	0.285714286
316	4.33	11::14 (1)	3	1	size0	size1	0.142857143
317	4.33	11::14 (1)	3	1	size0	size1	0.142857143
318	4.33	11::14 (1)	4	1	size0	size2	0.285714286
319	4.33	11::14 (1)	3	1	size0	size1	0.142857143
320	4.67	11::14 (1)	4	1	size1	size2	0.285714286
321	4.67	11::14 (1)	3	1	size1	size1	0.142857143
322	4.67	11::14 (1)	4	1	size1	size2	0.285714286
323	4.67	11::14 (1)	4	1	size1	size2	0.285714286
324	4.67	11::14 (1)	4	1	size1	size2	0.285714286
325	4.67	11::14 (1)	3	1	size1	size1	0.142857143
326	5.66	11::14 (1)	4	1	size3	size2	0.285714286
327	5.66	11::14 (1)	6	1	size3	size4	0.571428571
328	5.66	11::14 (1)	5	1	size3	size3	0.428571429
329	5.66	11::14 (1)	6	1	size3	size4	0.571428571
330	5.66	11::14 (1)	6	1	size3	size4	0.571428571
331	5.66	11::14 (1)	4	1	size3	size2	0.285714286
332	6	11::14 (1)	6	1	size4	size4	0.571428571
333	6	11::14 (1)	6	1	size4	size4	0.571428571
334	6	11::14 (1)	6	1	size4	size4	0.571428571
335	6	11::14 (1)	6.9	1	size4	size4	0.7
336	6	11::14 (1)	6	1	size4	size4	0.571428571
337	6	11::14 (1)	6	1	size4	size4	0.571428571
362	4.08	12::15 (1)	0	1	size1	size0	-0.00025
363	4.08	12::15 (1)	0	1	size1	size0	-0.00025
364	4.08	12::15 (1)	0	1	size1	size0	-0.00025
365	4.08	12::15 (1)	0	1	size1	size0	-0.00025
366	4.08	12::15 (1)	0	1	size1	size0	-0.00025
367	4.08	12::15 (1)	0	1	size1	size0	-0.00025
368	5	12::15 (1)	0	1	size2	size0	-0.00025
369	5	12::15 (1)	0	1	size2	size0	-0.00025
370	5	12::15 (1)	0	1	size2	size0	-0.00025
371	5	12::15 (1)	0	1	size2	size0	-0.00025
372	5	12::15 (1)	0	1	size2	size0	-0.00025
373	5	12::15 (1)	0	1	size2	size0	-0.00025
374	6	12::15 (1)	0	1	size4	size0	-0.00025
375	6	12::15 (1)	3.9	1	size4	size4	0.97475
376	6	12::15 (1)	3	1	size4	size3	0.74975
377	6	12::15 (1)	3.9	1	size4	size4	0.97475
378	6	12::15 (1)	2	1	size4	size2	0.49975
379	6	12::15 (1)	2	1	size4	size2	0.49975
380	6	12::15 (1)	1	1	size4	size1	0.24975
381	6	12::15 (1)	1	1	size4	size1	0.24975
382	6	12::15 (1)	1	1	size4	size1	0.24975
383	6	12::15 (1)	1	1	size4	size1	0.24975
384	6	12::15 (1)	1	1	size4	size1	0.24975
385	6	12::15 (1)	1	1	size4	size1	0.24975
386	5.08	12::15 (1)	0	1	size3	size0	-0.00025
387	5.08	12::15 (1)	0	1	size3	size0	-0.00025
388	5.08	12::15 (1)	0	1	size3	size0	-0.00025
389	5.08	12::15 (1)	0	1	size3	size0	-0.00025
390	5.08	12::15 (1)	0	1	size3	size0	-0.00025
391	5.08	12::15 (1)	0	1	size3	size0	-0.00025
392	4.02	12::15 (1)	0	1	size0	size0	-0.00025
393	4.02	12::15 (1)	0	1	size0	size0	-0.00025
394	4.02	12::15 (1)	1	1	size0	size1	0.24975
395	4.02	12::15 (1)	0	1	size0	size0	-0.00025
396	4.02	12::15 (1)	0	1	size0	size0	-0.00025
397	4.02	12::15 (1)	0	1	size0	size0	-0.00025
416	1.92	05::04:36:37 (1:1:1)	3	2	size1	size1	0.2999
417	1.92	05::04:36:37 (1:1:1)	3	2	size1	size1	0.2999
418	1.92	05::04:36:37 (1:1:1)	5	2	size1	size2	0.4999
419	1.92	05::04:36:37 (1:1:1)	6	2	size1	size2	0.5999
420	1.92	05::04:36:37 (1:1:1)	3	2	size1	size1	0.2999
421	1.92	05::04:36:37 (1:1:1)	3	2	size1	size1	0.2999
422	3.18	05::04:36:37 (1:1:1)	6	2	size3	size2	0.5999
423	3.18	05::04:36:37 (1:1:1)	7	2	size3	size3	0.6999
424	3.18	05::04:36:37 (1:1:1)	8	2	size3	size3	0.7999
425	3.18	05::04:36:37 (1:1:1)	9	2	size3	size4	0.8999
426	3.18	05::04:36:37 (1:1:1)	6	2	size3	size2	0.5999
427	3.18	05::04:36:37 (1:1:1)	7	2	size3	size3	0.6999
428	3.99	05::04:36:37 (1:1:1)	8	2	size4	size3	0.7999
429	3.99	05::04:36:37 (1:1:1)	9	2	size4	size4	0.8999
430	3.99	05::04:36:37 (1:1:1)	5	2	size4	size2	0.4999
431	3.99	05::04:36:37 (1:1:1)	9	2	size4	size4	0.8999
432	3.99	05::04:36:37 (1:1:1)	9.9	2	size4	size4	0.9899
433	3.99	05::04:36:37 (1:1:1)	9	2	size4	size4	0.8999
434	1.41	05::04:36:37 (1:1:1)	2	2	size0	size0	0.1999
435	1.41	05::04:36:37 (1:1:1)	3	2	size0	size1	0.2999
436	1.41	05::04:36:37 (1:1:1)	3	2	size0	size1	0.2999
437	1.41	05::04:36:37 (1:1:1)	0	2	size0	size0	-0.0001
438	1.41	05::04:36:37 (1:1:1)	3	2	size0	size1	0.2999
439	1.41	05::04:36:37 (1:1:1)	2	2	size0	size0	0.1999
440	2.67	05::04:36:37 (1:1:1)	5	2	size2	size2	0.4999
441	2.67	05::04:36:37 (1:1:1)	6	2	size2	size2	0.5999
442	2.67	05::04:36:37 (1:1:1)	1	2	size2	size0	0.0999
443	2.67	05::04:36:37 (1:1:1)	2	2	size2	size0	0.1999
444	2.67	05::04:36:37 (1:1:1)	3	2	size2	size1	0.2999
445	2.67	05::04:36:37 (1:1:1)	3	2	size2	size1	0.2999
477	1.35	01::04:35:36 (2:2:1)	1	2	size0	size0	0.0999
478	1.35	01::04:35:36 (2:2:1)	2	2	size0	size0	0.1999
479	1.35	01::04:35:36 (2:2:1)	2	2	size0	size0	0.1999
480	1.35	01::04:35:36 (2:2:1)	2	2	size0	size0	0.1999
481	1.35	01::04:35:36 (2:2:1)	4	2	size0	size1	0.3999
482	1.35	01::04:35:36 (2:2:1)	2	2	size0	size0	0.1999
483	1.35	01::04:35:36 (2:2:1)	0	2	size0	size0	-0.0001
484	1.35	01::04:35:36 (2:2:1)	0	2	size0	size0	-0.0001
485	1.35	01::04:35:36 (2:2:1)	0	2	size0	size0	-0.0001
486	1.35	01::04:35:36 (2:2:1)	0	2	size0	size0	-0.0001
487	1.35	01::04:35:36 (2:2:1)	0	2	size0	size0	-0.0001
488	1.35	01::04:35:36 (2:2:1)	0	2	size0	size0	-0.0001
489	2.45	01::04:35:36 (2:2:1)	7	2	size2	size3	0.6999
490	2.45	01::04:35:36 (2:2:1)	3	2	size2	size1	0.2999
491	2.45	01::04:35:36 (2:2:1)	1	2	size2	size0	0.0999
492	2.45	01::04:35:36 (2:2:1)	6	2	size2	size2	0.5999
493	2.45	01::04:35:36 (2:2:1)	4	2	size2	size1	0.3999
494	2.45	01::04:35:36 (2:2:1)	5	2	size2	size2	0.4999
495	3.5	01::04:35:36 (2:2:1)	9	2	size4	size4	0.8999
496	3.5	01::04:35:36 (2:2:1)	7	2	size4	size3	0.6999
497	3.5	01::04:35:36 (2:2:1)	5	2	size4	size2	0.4999
498	3.5	01::04:35:36 (2:2:1)	6	2	size4	size2	0.5999
499	3.5	01::04:35:36 (2:2:1)	7	2	size4	size3	0.6999
500	3.5	01::04:35:36 (2:2:1)	7	2	size4	size3	0.6999
501	3.5	01::04:35:36 (2:2:1)	9.9	2	size4	size4	0.9899
502	3.5	01::04:35:36 (2:2:1)	4	2	size4	size1	0.3999
503	3.5	01::04:35:36 (2:2:1)	5	2	size4	size2	0.4999
504	3.5	01::04:35:36 (2:2:1)	6	2	size4	size2	0.5999
505	3.5	01::04:35:36 (2:2:1)	4	2	size4	size1	0.3999
506	3.5	01::04:35:36 (2:2:1)	6	2	size4	size2	0.5999
507	3.5	01::04:35:36 (2:2:1)	5	2	size4	size2	0.4999
508	1.85	01::04:35:36 (2:2:1)	3	2	size1	size1	0.2999
509	1.85	01::04:35:36 (2:2:1)	2	2	size1	size0	0.1999
510	1.85	01::04:35:36 (2:2:1)	2	2	size1	size0	0.1999
511	1.85	01::04:35:36 (2:2:1)	2	2	size1	size0	0.1999
512	1.85	01::04:35:36 (2:2:1)	4	2	size1	size1	0.3999
513	1.85	01::04:35:36 (2:2:1)	3	2	size1	size1	0.2999
514	3	01::04:35:36 (2:2:1)	3	2	size3	size1	0.2999
515	3	01::04:35:36 (2:2:1)	3	2	size3	size1	0.2999
516	3	01::04:35:36 (2:2:1)	3	2	size3	size1	0.2999
517	3	01::04:35:36 (2:2:1)	6	2	size3	size2	0.5999
518	3	01::04:35:36 (2:2:1)	4	2	size3	size1	0.3999
519	3	01::04:35:36 (2:2:1)	4	2	size3	size1	0.3999
543	1.32	06::03:35 (1:1)	0	2	size0	size0	-0.0001
544	1.32	06::03:35 (1:1)	0	2	size0	size0	-0.0001
545	1.32	06::03:35 (1:1)	0	2	size0	size0	-0.0001
546	1.32	06::03:35 (1:1)	1	2	size0	size0	0.0999
547	1.32	06::03:35 (1:1)	1	2	size0	size0	0.0999
548	1.32	06::03:35 (1:1)	1	2	size0	size0	0.0999
549	2	06::03:35 (1:1)	4	2	size1	size1	0.3999
550	2	06::03:35 (1:1)	2	2	size1	size0	0.1999
551	2	06::03:35 (1:1)	2	2	size1	size0	0.1999
552	2	06::03:35 (1:1)	5	2	size1	size2	0.4999
553	2	06::03:35 (1:1)	3	2	size1	size1	0.2999
554	2	06::03:35 (1:1)	3	2	size1	size1	0.2999
555	4	06::03:35 (1:1)	6	2	size4	size2	0.5999
556	4	06::03:35 (1:1)	7	2	size4	size3	0.6999
557	4	06::03:35 (1:1)	9	2	size4	size4	0.8999
558	4	06::03:35 (1:1)	9	2	size4	size4	0.8999
559	4	06::03:35 (1:1)	9.9	2	size4	size4	0.9899
560	4	06::03:35 (1:1)	0	2	size4	size0	-0.0001
561	3.16	06::03:35 (1:1)	6	2	size3	size2	0.5999
562	3.16	06::03:35 (1:1)	4	2	size3	size1	0.3999
563	3.16	06::03:35 (1:1)	3	2	size3	size1	0.2999
564	3.16	06::03:35 (1:1)	2	2	size3	size0	0.1999
565	3.16	06::03:35 (1:1)	2	2	size3	size0	0.1999
566	3.16	06::03:35 (1:1)	0	2	size3	size0	-0.0001
567	2.66	06::03:35 (1:1)	6	2	size2	size2	0.5999
568	2.66	06::03:35 (1:1)	8	2	size2	size3	0.7999
569	2.66	06::03:35 (1:1)	4	2	size2	size1	0.3999
570	2.66	06::03:35 (1:1)	2	2	size2	size0	0.1999
571	2.66	06::03:35 (1:1)	3	2	size2	size1	0.2999
572	2.66	06::03:35 (1:1)	6	2	size2	size2	0.5999
573	2.66	06::03:35 (1:1)	6	2	size2	size2	0.5999
574	2.66	06::03:35 (1:1)	3	2	size2	size1	0.2999
575	2.66	06::03:35 (1:1)	5	2	size2	size2	0.4999
576	2.66	06::03:35 (1:1)	4	2	size2	size1	0.3999
577	2.66	06::03:35 (1:1)	5	2	size2	size2	0.4999
596	1	01::02:33:34 (2:1:1)	3	2	size0	size1	0.333222222
597	1	01::02:33:34 (2:1:1)	0	2	size0	size0	-0.000111111
598	1	01::02:33:34 (2:1:1)	0	2	size0	size0	-0.000111111
599	1	01::02:33:34 (2:1:1)	0	2	size0	size0	-0.000111111
600	1	01::02:33:34 (2:1:1)	0	2	size0	size0	-0.000111111
601	1	01::02:33:34 (2:1:1)	0	2	size0	size0	-0.000111111
602	3.08	01::02:33:34 (2:1:1)	5	2	size2	size2	0.555444444
603	3.08	01::02:33:34 (2:1:1)	1	2	size2	size0	0.111
604	3.08	01::02:33:34 (2:1:1)	4	2	size2	size2	0.444333333
605	3.08	01::02:33:34 (2:1:1)	5	2	size2	size2	0.555444444
606	3.08	01::02:33:34 (2:1:1)	4	2	size2	size2	0.444333333
607	3.08	01::02:33:34 (2:1:1)	3	2	size2	size1	0.333222222
608	2	01::02:33:34 (2:1:1)	3	2	size1	size1	0.333222222
609	2	01::02:33:34 (2:1:1)	4	2	size1	size2	0.444333333
610	2	01::02:33:34 (2:1:1)	3	2	size1	size1	0.333222222
611	2	01::02:33:34 (2:1:1)	2	2	size1	size1	0.222111111
612	2	01::02:33:34 (2:1:1)	3	2	size1	size1	0.333222222
613	2	01::02:33:34 (2:1:1)	1	2	size1	size0	0.111
614	4	01::02:33:34 (2:1:1)	5	2	size3	size2	0.555444444
615	4	01::02:33:34 (2:1:1)	3	2	size3	size1	0.333222222
616	4	01::02:33:34 (2:1:1)	4	2	size3	size2	0.444333333
617	4	01::02:33:34 (2:1:1)	4	2	size3	size2	0.444333333
618	4	01::02:33:34 (2:1:1)	4	2	size3	size2	0.444333333
619	4	01::02:33:34 (2:1:1)	6	2	size3	size3	0.666555556
620	5	01::02:33:34 (2:1:1)	8	2	size4	size4	0.888777778
621	5	01::02:33:34 (2:1:1)	8.9	2	size4	size4	0.988777778
622	5	01::02:33:34 (2:1:1)	8.9	2	size4	size4	0.988777778
623	5	01::02:33:34 (2:1:1)	3	2	size4	size1	0.333222222
624	5	01::02:33:34 (2:1:1)	6	2	size4	size3	0.666555556
625	5	01::02:33:34 (2:1:1)	5	2	size4	size2	0.555444444
644	5.25	Unipolar: 24	5	4	size3	size4	0.833166667
645	5.25	Unipolar: 24	5	4	size3	size4	0.833166667
646	5.25	Unipolar: 24	5.9	4	size3	size4	0.983166667
647	5.25	Unipolar: 24	5	4	size3	size4	0.833166667
648	5.25	Unipolar: 24	5	4	size3	size4	0.833166667
649	5.25	Unipolar: 24	5	4	size3	size4	0.833166667
650	3	Unipolar: 24	2	4	size1	size1	0.333166667
651	3	Unipolar: 24	2	4	size1	size1	0.333166667
652	3	Unipolar: 24	2	4	size1	size1	0.333166667
653	3	Unipolar: 24	2	4	size1	size1	0.333166667
654	3	Unipolar: 24	1	4	size1	size0	0.1665
655	3	Unipolar: 24	1	4	size1	size0	0.1665
656	2.25	Unipolar: 24	0	4	size0	size0	-0.000166667
657	2.25	Unipolar: 24	0	4	size0	size0	-0.000166667
658	2.25	Unipolar: 24	0	4	size0	size0	-0.000166667
659	2.25	Unipolar: 24	1	4	size0	size0	0.1665
660	2.25	Unipolar: 24	0	4	size0	size0	-0.000166667
661	2.25	Unipolar: 24	0	4	size0	size0	-0.000166667
662	6	Unipolar: 24	5	4	size4	size4	0.833166667
663	6	Unipolar: 24	5.9	4	size4	size4	0.983166667
664	6	Unipolar: 24	5.9	4	size4	size4	0.983166667
665	6	Unipolar: 24	5	4	size4	size4	0.833166667
666	6	Unipolar: 24	5	4	size4	size4	0.833166667
667	6	Unipolar: 24	5	4	size4	size4	0.833166667
668	3.75	Unipolar: 24	4	4	size2	size3	0.6665
669	3.75	Unipolar: 24	4	4	size2	size3	0.6665
670	3.75	Unipolar: 24	4	4	size2	size3	0.6665
671	3.75	Unipolar: 24	4	4	size2	size3	0.6665
672	3.75	Unipolar: 24	4	4	size2	size3	0.6665
673	3.75	Unipolar: 24	4	4	size2	size3	0.6665
710	5.25	Unipolar: 25	5.9	4	size3	size4	0.816666667
711	5.25	Unipolar: 25	5.9	4	size3	size4	0.816666667
712	5.25	Unipolar: 25	5.9	4	size3	size4	0.816666667
713	5.25	Unipolar: 25	5.9	4	size3	size4	0.816666667
714	5.25	Unipolar: 25	5.9	4	size3	size4	0.816666667
715	5.25	Unipolar: 25	5.9	4	size3	size4	0.816666667
716	5.25	Unipolar: 25	5.9	4	size3	size4	0.816666667
717	5.25	Unipolar: 25	5.9	4	size3	size4	0.816666667
718	5.25	Unipolar: 25	5.9	4	size3	size4	0.816666667
719	5.25	Unipolar: 25	5.9	4	size3	size4	0.816666667
720	5.25	Unipolar: 25	5.9	4	size3	size4	0.816666667
721	5.25	Unipolar: 25	5	4	size3	size4	0.666666667
722	3.75	Unipolar: 25	5	4	size2	size4	0.666666667
723	3.75	Unipolar: 25	5	4	size2	size4	0.666666667
724	3.75	Unipolar: 25	5	4	size2	size4	0.666666667
725	3.75	Unipolar: 25	5	4	size2	size4	0.666666667
726	3.75	Unipolar: 25	5	4	size2	size4	0.666666667
727	3.75	Unipolar: 25	5	4	size2	size4	0.666666667
728	3.75	Unipolar: 25	5	4	size2	size4	0.666666667
729	3.75	Unipolar: 25	4	4	size2	size3	0.5
730	3.75	Unipolar: 25	3	4	size2	size2	0.333333333
731	3.75	Unipolar: 25	5	4	size2	size4	0.666666667
732	3.75	Unipolar: 25	4	4	size2	size3	0.5
733	3.75	Unipolar: 25	4	4	size2	size3	0.5
734	6	Unipolar: 25	5.9	4	size4	size4	0.816666667
735	6	Unipolar: 25	5.9	4	size4	size4	0.816666667
736	6	Unipolar: 25	5.9	4	size4	size4	0.816666667
737	6	Unipolar: 25	5.9	4	size4	size4	0.816666667
738	6	Unipolar: 25	5.9	4	size4	size4	0.816666667
739	6	Unipolar: 25	5.9	4	size4	size4	0.816666667
740	6	Unipolar: 25	5.9	4	size4	size4	0.816666667
741	6	Unipolar: 25	5.9	4	size4	size4	0.816666667
742	6	Unipolar: 25	5.9	4	size4	size4	0.816666667
743	6	Unipolar: 25	5.9	4	size4	size4	0.816666667
744	6	Unipolar: 25	5.9	4	size4	size4	0.816666667
745	6	Unipolar: 25	5.9	4	size4	size4	0.816666667
746	2.25	Unipolar: 25	1	4	size0	size0	0
747	2.25	Unipolar: 25	2	4	size0	size1	0.166666667
748	2.25	Unipolar: 25	3	4	size0	size2	0.333333333
749	2.25	Unipolar: 25	3	4	size0	size2	0.333333333
750	2.25	Unipolar: 25	2	4	size0	size1	0.166666667
751	2.25	Unipolar: 25	1	4	size0	size0	0
752	2.25	Unipolar: 25	2	4	size0	size1	0.166666667
753	2.25	Unipolar: 25	2	4	size0	size1	0.166666667
754	2.25	Unipolar: 25	1	4	size0	size0	0
755	2.25	Unipolar: 25	2	4	size0	size1	0.166666667
756	2.25	Unipolar: 25	2	4	size0	size1	0.166666667
757	2.25	Unipolar: 25	2	4	size0	size1	0.166666667
758	3	Unipolar: 25	4	4	size1	size3	0.5
759	3	Unipolar: 25	4	4	size1	size3	0.5
760	3	Unipolar: 25	4	4	size1	size3	0.5
761	3	Unipolar: 25	4	4	size1	size3	0.5
762	3	Unipolar: 25	4	4	size1	size3	0.5
763	3	Unipolar: 25	4	4	size1	size3	0.5
764	3	Unipolar: 25	4	4	size1	size3	0.5
765	3	Unipolar: 25	4	4	size1	size3	0.5
766	3	Unipolar: 25	4	4	size1	size3	0.5
767	3	Unipolar: 25	4	4	size1	size3	0.5
768	3	Unipolar: 25	4	4	size1	size3	0.5
769	3	Unipolar: 25	4	4	size1	size3	0.5
788	3	Unipolar: 21	3	4	size1	size2	0.499833333
789	3	Unipolar: 21	3	4	size1	size2	0.499833333
790	3	Unipolar: 21	3	4	size1	size2	0.499833333
791	3	Unipolar: 21	4	4	size1	size3	0.6665
792	3	Unipolar: 21	3	4	size1	size2	0.499833333
793	3	Unipolar: 21	3	4	size1	size2	0.499833333
794	4.5	Unipolar: 21	4	4	size2	size3	0.6665
795	4.5	Unipolar: 21	4	4	size2	size3	0.6665
796	4.5	Unipolar: 21	5	4	size2	size4	0.833166667
797	4.5	Unipolar: 21	5	4	size2	size4	0.833166667
798	4.5	Unipolar: 21	5	4	size2	size4	0.833166667
799	4.5	Unipolar: 21	5	4	size2	size4	0.833166667
800	5.25	Unipolar: 21	4	4	size3	size3	0.6665
801	5.25	Unipolar: 21	5	4	size3	size4	0.833166667
802	5.25	Unipolar: 21	5.9	4	size3	size4	0.983166667
803	5.25	Unipolar: 21	5	4	size3	size4	0.833166667
804	5.25	Unipolar: 21	5.9	4	size3	size4	0.983166667
805	5.25	Unipolar: 21	5.9	4	size3	size4	0.983166667
806	2.25	Unipolar: 21	0	4	size0	size0	-0.000166667
807	2.25	Unipolar: 21	1	4	size0	size0	0.1665
808	2.25	Unipolar: 21	1	4	size0	size0	0.1665
809	2.25	Unipolar: 21	0	4	size0	size0	-0.000166667
810	2.25	Unipolar: 21	1	4	size0	size0	0.1665
811	2.25	Unipolar: 21	0	4	size0	size0	-0.000166667
812	6	Unipolar: 21	5	4	size4	size4	0.833166667
813	6	Unipolar: 21	5.9	4	size4	size4	0.983166667
814	6	Unipolar: 21	5.9	4	size4	size4	0.983166667
815	6	Unipolar: 21	5.9	4	size4	size4	0.983166667
816	6	Unipolar: 21	5.9	4	size4	size4	0.983166667
817	6	Unipolar: 21	5.9	4	size4	size4	0.983166667
836	3	Unipolar: 05	5	4	size1	size4	0.666666667
837	3	Unipolar: 05	4	4	size1	size3	0.5
838	3	Unipolar: 05	4	4	size1	size3	0.5
839	3	Unipolar: 05	3	4	size1	size2	0.333333333
840	3	Unipolar: 05	4	4	size1	size3	0.5
841	3	Unipolar: 05	3	4	size1	size2	0.333333333
842	3	Unipolar: 05	1	4	size1	size0	0
843	3	Unipolar: 05	3	4	size1	size2	0.333333333
844	3	Unipolar: 05	3	4	size1	size2	0.333333333
845	3	Unipolar: 05	4	4	size1	size3	0.5
846	3	Unipolar: 05	5	4	size1	size4	0.666666667
847	3	Unipolar: 05	4	4	size1	size3	0.5
848	3.75	Unipolar: 05	5	4	size2	size4	0.666666667
849	3.75	Unipolar: 05	5	4	size2	size4	0.666666667
850	3.75	Unipolar: 05	5	4	size2	size4	0.666666667
851	3.75	Unipolar: 05	5	4	size2	size4	0.666666667
852	3.75	Unipolar: 05	5	4	size2	size4	0.666666667
853	3.75	Unipolar: 05	5	4	size2	size4	0.666666667
854	2.25	Unipolar: 05	1	4	size0	size0	0
855	2.25	Unipolar: 05	1	4	size0	size0	0
856	2.25	Unipolar: 05	1	4	size0	size0	0
857	2.25	Unipolar: 05	1	4	size0	size0	0
858	2.25	Unipolar: 05	1	4	size0	size0	0
859	2.25	Unipolar: 05	1	4	size0	size0	0
860	6	Unipolar: 05	5.9	4	size4	size4	0.816666667
861	6	Unipolar: 05	5.9	4	size4	size4	0.816666667
862	6	Unipolar: 05	5	4	size4	size4	0.666666667
863	6	Unipolar: 05	5.9	4	size4	size4	0.816666667
864	6	Unipolar: 05	5.9	4	size4	size4	0.816666667
865	6	Unipolar: 05	5.9	4	size4	size4	0.816666667
866	5.25	Unipolar: 05	5.9	4	size3	size4	0.816666667
867	5.25	Unipolar: 05	5	4	size3	size4	0.666666667
868	5.25	Unipolar: 05	5.9	4	size3	size4	0.816666667
869	5.25	Unipolar: 05	5.9	4	size3	size4	0.816666667
870	5.25	Unipolar: 05	5.9	4	size3	size4	0.816666667
871	5.25	Unipolar: 05	5.9	4	size3	size4	0.816666667
890	5	Unipolar: 08	4	4	size3	size3	0.6665
891	5	Unipolar: 08	5	4	size3	size4	0.833166667
892	5	Unipolar: 08	4	4	size3	size3	0.6665
893	5	Unipolar: 08	4	4	size3	size3	0.6665
894	5	Unipolar: 08	5	4	size3	size4	0.833166667
895	5	Unipolar: 08	5	4	size3	size4	0.833166667
896	3	Unipolar: 08	1	4	size1	size0	0.1665
897	3	Unipolar: 08	1	4	size1	size0	0.1665
898	3	Unipolar: 08	1	4	size1	size0	0.1665
899	3	Unipolar: 08	2	4	size1	size1	0.333166667
900	3	Unipolar: 08	1	4	size1	size0	0.1665
901	3	Unipolar: 08	2	4	size1	size1	0.333166667
902	2.25	Unipolar: 08	0	4	size0	size0	-0.000166667
903	2.25	Unipolar: 08	0	4	size0	size0	-0.000166667
904	2.25	Unipolar: 08	0	4	size0	size0	-0.000166667
905	2.25	Unipolar: 08	0	4	size0	size0	-0.000166667
906	2.25	Unipolar: 08	0	4	size0	size0	-0.000166667
907	2.25	Unipolar: 08	0	4	size0	size0	-0.000166667
908	6	Unipolar: 08	4	4	size4	size3	0.6665
909	6	Unipolar: 08	5	4	size4	size4	0.833166667
910	6	Unipolar: 08	5	4	size4	size4	0.833166667
911	6	Unipolar: 08	5	4	size4	size4	0.833166667
912	6	Unipolar: 08	5	4	size4	size4	0.833166667
913	6	Unipolar: 08	5.9	4	size4	size4	0.983166667
914	3.75	Unipolar: 08	1	4	size2	size0	0.1665
915	3.75	Unipolar: 08	2	4	size2	size1	0.333166667
916	3.75	Unipolar: 08	3	4	size2	size2	0.499833333
917	3.75	Unipolar: 08	3	4	size2	size2	0.499833333
918	3.75	Unipolar: 08	4	4	size2	size3	0.6665
919	3.75	Unipolar: 08	3	4	size2	size2	0.499833333
