# Supplementary material for: Sensory restoration by epidural stimulation of the lateral spinal cord in upper-limb amputees
Source: eLife. 2020 Jul 21;9:e54349. doi: 10.7554/eLife.54349 (PMC7373432; doi:10.7554/eLife.54349)
Supplement: Figure 4—source data 1. [file elife-54349-fig4-data1.csv]

subject	electrode	detection threshold (mA)
1	1	3.75
1	3	3.75
2	1	1.14
2	2	1.21
2	4	1.11
2	5	0.92
3	1	1.98
3	2	2.17
3	3	1.67
3	4	0.97
3	5	1.28
3	6	1.53
3	7	1.48
3	8	1.65
4	1	1.52
4	3	1.5
4	4	2.02
4	5	2.21
4	6	2.38
4	7	1.97
4	8	1.95
4	9	2.14
4	10	1.98
4	11	2.13
4	13	1.5
4	14	1.95
4	15	2.1
4	16	1.83
