# Supplementary material for: Sensory restoration by epidural stimulation of the lateral spinal cord in upper-limb amputees
Source: eLife. 2020 Jul 21;9:e54349. doi: 10.7554/eLife.54349 (PMC7373432; doi:10.7554/eLife.54349)
Supplement: Figure 4—source data 2. [file elife-54349-fig4-data2.csv]

	stimulation amplitude	electrode	reported magnitude	subject	amplitude bin	magnitude bin	normalized magnitude
0	4	05::04:21:22:23 (1:1:1:2)	4	3	size1	size1	0.428571429
1	4	05::04:21:22:23 (1:1:1:2)	3	3	size1	size1	0.285714286
2	4	05::04:21:22:23 (1:1:1:2)	3	3	size1	size1	0.285714286
3	4	05::04:21:22:23 (1:1:1:2)	1	3	size1	size0	0
4	4	05::04:21:22:23 (1:1:1:2)	4	3	size1	size1	0.428571429
5	6	05::04:21:22:23 (1:1:1:2)	6	3	size2	size2	0.714285714
6	6	05::04:21:22:23 (1:1:1:2)	6	3	size2	size2	0.714285714
7	6	05::04:21:22:23 (1:1:1:2)	6.9	3	size2	size2	0.842857143
8	6	05::04:21:22:23 (1:1:1:2)	4	3	size2	size1	0.428571429
9	6	05::04:21:22:23 (1:1:1:2)	6.9	3	size2	size2	0.842857143
10	2	05::04:21:22:23 (1:1:1:2)	1	3	size0	size0	0
11	2	05::04:21:22:23 (1:1:1:2)	1	3	size0	size0	0
12	2	05::04:21:22:23 (1:1:1:2)	1	3	size0	size0	0
13	2	05::04:21:22:23 (1:1:1:2)	1	3	size0	size0	0
14	2	05::04:21:22:23 (1:1:1:2)	1	3	size0	size0	0
40	2	05::04:06 (1:1)	1	3	size0	size0	0.1998
41	2	05::04:06 (1:1)	3	3	size0	size1	0.5998
42	2	05::04:06 (1:1)	0	3	size0	size0	-0.0002
43	2	05::04:06 (1:1)	0	3	size0	size0	-0.0002
44	2	05::04:06 (1:1)	0	3	size0	size0	-0.0002
45	2	05::04:06 (1:1)	0	3	size0	size0	-0.0002
46	2	05::04:06 (1:1)	0	3	size0	size0	-0.0002
47	2	05::04:06 (1:1)	0	3	size0	size0	-0.0002
48	2	05::04:06 (1:1)	0	3	size0	size0	-0.0002
49	2	05::04:06 (1:1)	0	3	size0	size0	-0.0002
50	6	05::04:06 (1:1)	4.9	3	size2	size2	0.9798
51	6	05::04:06 (1:1)	4	3	size2	size2	0.7998
52	6	05::04:06 (1:1)	4.9	3	size2	size2	0.9798
53	6	05::04:06 (1:1)	4.9	3	size2	size2	0.9798
54	6	05::04:06 (1:1)	3	3	size2	size1	0.5998
55	6	05::04:06 (1:1)	3	3	size2	size1	0.5998
56	6	05::04:06 (1:1)	4	3	size2	size2	0.7998
57	6	05::04:06 (1:1)	4	3	size2	size2	0.7998
58	6	05::04:06 (1:1)	4.9	3	size2	size2	0.9798
59	6	05::04:06 (1:1)	4.9	3	size2	size2	0.9798
60	4	05::04:06 (1:1)	3	3	size1	size1	0.5998
61	4	05::04:06 (1:1)	4	3	size1	size2	0.7998
62	4	05::04:06 (1:1)	4	3	size1	size2	0.7998
63	4	05::04:06 (1:1)	3	3	size1	size1	0.5998
64	4	05::04:06 (1:1)	3	3	size1	size1	0.5998
65	4	05::04:06 (1:1)	2	3	size1	size1	0.3998
66	4	05::04:06 (1:1)	2	3	size1	size1	0.3998
67	4	05::04:06 (1:1)	2	3	size1	size1	0.3998
68	4	05::04:06 (1:1)	3	3	size1	size1	0.5998
69	4	05::04:06 (1:1)	2	3	size1	size1	0.3998
120	4.5	05::06:07 (1:1)	4	3	size1	size1	0.428571429
121	4.5	05::06:07 (1:1)	3	3	size1	size1	0.285714286
122	4.5	05::06:07 (1:1)	3	3	size1	size1	0.285714286
123	4.5	05::06:07 (1:1)	5	3	size1	size2	0.571428571
124	4.5	05::06:07 (1:1)	3	3	size1	size1	0.285714286
125	6	05::06:07 (1:1)	6	3	size2	size2	0.714285714
126	6	05::06:07 (1:1)	6.9	3	size2	size2	0.842857143
127	6	05::06:07 (1:1)	5	3	size2	size2	0.571428571
128	6	05::06:07 (1:1)	6.9	3	size2	size2	0.842857143
129	6	05::06:07 (1:1)	6.9	3	size2	size2	0.842857143
130	6	05::06:07 (1:1)	5	3	size2	size2	0.571428571
131	6	05::06:07 (1:1)	5	3	size2	size2	0.571428571
132	6	05::06:07 (1:1)	6	3	size2	size2	0.714285714
133	6	05::06:07 (1:1)	5	3	size2	size2	0.571428571
134	6	05::06:07 (1:1)	4	3	size2	size1	0.428571429
135	3	05::06:07 (1:1)	3	3	size0	size1	0.285714286
136	3	05::06:07 (1:1)	1	3	size0	size0	0
137	3	05::06:07 (1:1)	2	3	size0	size0	0.142857143
138	3	05::06:07 (1:1)	2	3	size0	size0	0.142857143
139	3	05::06:07 (1:1)	1	3	size0	size0	0
170	4.22	05::06 (1)	3	3	size1	size1	0.499833333
171	4.22	05::06 (1)	2	3	size1	size0	0.333166667
172	4.22	05::06 (1)	2	3	size1	size0	0.333166667
173	4.22	05::06 (1)	2	3	size1	size0	0.333166667
174	4.22	05::06 (1)	5	3	size1	size2	0.833166667
175	6	05::06 (1)	5.9	3	size2	size2	0.983166667
176	6	05::06 (1)	5.9	3	size2	size2	0.983166667
177	6	05::06 (1)	5.9	3	size2	size2	0.983166667
178	6	05::06 (1)	4	3	size2	size1	0.6665
179	6	05::06 (1)	4	3	size2	size1	0.6665
180	2	05::06 (1)	1	3	size0	size0	0.1665
181	2	05::06 (1)	0	3	size0	size0	-0.000166667
182	2	05::06 (1)	0	3	size0	size0	-0.000166667
183	2	05::06 (1)	0	3	size0	size0	-0.000166667
184	2	05::06 (1)	0	3	size0	size0	-0.000166667
210	1.5	Unipolar: 06	1	3	size0	size0	0
211	1.5	Unipolar: 06	1	3	size0	size0	0
212	1.5	Unipolar: 06	1	3	size0	size0	0
213	1.5	Unipolar: 06	1	3	size0	size0	0
214	1.5	Unipolar: 06	1	3	size0	size0	0
215	6	Unipolar: 06	5	3	size2	size2	0.666666667
216	6	Unipolar: 06	5.9	3	size2	size2	0.816666667
217	6	Unipolar: 06	5.9	3	size2	size2	0.816666667
218	6	Unipolar: 06	5.9	3	size2	size2	0.816666667
219	6	Unipolar: 06	5.9	3	size2	size2	0.816666667
220	3.5	Unipolar: 06	3	3	size1	size1	0.333333333
221	3.5	Unipolar: 06	4	3	size1	size1	0.5
222	3.5	Unipolar: 06	4	3	size1	size1	0.5
223	3.5	Unipolar: 06	5	3	size1	size2	0.666666667
224	3.5	Unipolar: 06	3	3	size1	size1	0.333333333
250	2	Unipolar: 07	1	3	size0	size0	0.1665
251	2	Unipolar: 07	0	3	size0	size0	-0.000166667
252	2	Unipolar: 07	1	3	size0	size0	0.1665
253	2	Unipolar: 07	1	3	size0	size0	0.1665
254	2	Unipolar: 07	1	3	size0	size0	0.1665
255	4	Unipolar: 07	4	3	size1	size1	0.6665
256	4	Unipolar: 07	5	3	size1	size2	0.833166667
257	4	Unipolar: 07	4	3	size1	size1	0.6665
258	4	Unipolar: 07	4	3	size1	size1	0.6665
259	4	Unipolar: 07	5	3	size1	size2	0.833166667
260	6	Unipolar: 07	5	3	size2	size2	0.833166667
261	6	Unipolar: 07	4	3	size2	size1	0.6665
262	6	Unipolar: 07	5.9	3	size2	size2	0.983166667
263	6	Unipolar: 07	5	3	size2	size2	0.833166667
264	6	Unipolar: 07	5.9	3	size2	size2	0.983166667
290	5.32	11::14 (1)	5	1	size1	size1	0.428571429
291	5.32	11::14 (1)	4	1	size1	size1	0.285714286
292	5.32	11::14 (1)	4	1	size1	size1	0.285714286
293	5.32	11::14 (1)	6	1	size1	size2	0.571428571
294	5.32	11::14 (1)	5	1	size1	size1	0.428571429
295	5.32	11::14 (1)	6	1	size1	size2	0.571428571
296	4.33	11::14 (1)	2	1	size0	size0	0
297	4.33	11::14 (1)	4	1	size0	size1	0.285714286
298	4.33	11::14 (1)	3	1	size0	size0	0.142857143
299	4.33	11::14 (1)	3	1	size0	size0	0.142857143
300	4.33	11::14 (1)	4	1	size0	size1	0.285714286
301	4.33	11::14 (1)	3	1	size0	size0	0.142857143
302	6	11::14 (1)	6	1	size2	size2	0.571428571
303	6	11::14 (1)	6	1	size2	size2	0.571428571
304	6	11::14 (1)	6	1	size2	size2	0.571428571
305	6	11::14 (1)	6.9	1	size2	size2	0.7
306	6	11::14 (1)	6	1	size2	size2	0.571428571
307	6	11::14 (1)	6	1	size2	size2	0.571428571
338	5	12::15 (1)	0	1	size1	size0	-0.00025
339	5	12::15 (1)	0	1	size1	size0	-0.00025
340	5	12::15 (1)	0	1	size1	size0	-0.00025
341	5	12::15 (1)	0	1	size1	size0	-0.00025
342	5	12::15 (1)	0	1	size1	size0	-0.00025
343	5	12::15 (1)	0	1	size1	size0	-0.00025
344	6	12::15 (1)	0	1	size2	size0	-0.00025
345	6	12::15 (1)	3.9	1	size2	size2	0.97475
346	6	12::15 (1)	3	1	size2	size2	0.74975
347	6	12::15 (1)	3.9	1	size2	size2	0.97475
348	6	12::15 (1)	2	1	size2	size1	0.49975
349	6	12::15 (1)	2	1	size2	size1	0.49975
350	6	12::15 (1)	1	1	size2	size0	0.24975
351	6	12::15 (1)	1	1	size2	size0	0.24975
352	6	12::15 (1)	1	1	size2	size0	0.24975
353	6	12::15 (1)	1	1	size2	size0	0.24975
354	6	12::15 (1)	1	1	size2	size0	0.24975
355	6	12::15 (1)	1	1	size2	size0	0.24975
356	4.02	12::15 (1)	0	1	size0	size0	-0.00025
357	4.02	12::15 (1)	0	1	size0	size0	-0.00025
358	4.02	12::15 (1)	1	1	size0	size0	0.24975
359	4.02	12::15 (1)	0	1	size0	size0	-0.00025
360	4.02	12::15 (1)	0	1	size0	size0	-0.00025
361	4.02	12::15 (1)	0	1	size0	size0	-0.00025
398	3.99	05::04:36:37 (1:1:1)	8	2	size2	size2	0.7999
399	3.99	05::04:36:37 (1:1:1)	9	2	size2	size2	0.8999
400	3.99	05::04:36:37 (1:1:1)	5	2	size2	size1	0.4999
401	3.99	05::04:36:37 (1:1:1)	9	2	size2	size2	0.8999
402	3.99	05::04:36:37 (1:1:1)	9.9	2	size2	size2	0.9899
403	3.99	05::04:36:37 (1:1:1)	9	2	size2	size2	0.8999
404	1.41	05::04:36:37 (1:1:1)	2	2	size0	size0	0.1999
405	1.41	05::04:36:37 (1:1:1)	3	2	size0	size0	0.2999
406	1.41	05::04:36:37 (1:1:1)	3	2	size0	size0	0.2999
407	1.41	05::04:36:37 (1:1:1)	0	2	size0	size0	-0.0001
408	1.41	05::04:36:37 (1:1:1)	3	2	size0	size0	0.2999
409	1.41	05::04:36:37 (1:1:1)	2	2	size0	size0	0.1999
410	2.67	05::04:36:37 (1:1:1)	5	2	size1	size1	0.4999
411	2.67	05::04:36:37 (1:1:1)	6	2	size1	size1	0.5999
412	2.67	05::04:36:37 (1:1:1)	1	2	size1	size0	0.0999
413	2.67	05::04:36:37 (1:1:1)	2	2	size1	size0	0.1999
414	2.67	05::04:36:37 (1:1:1)	3	2	size1	size0	0.2999
415	2.67	05::04:36:37 (1:1:1)	3	2	size1	size0	0.2999
446	1.35	01::04:35:36 (2:2:1)	1	2	size0	size0	0.0999
447	1.35	01::04:35:36 (2:2:1)	2	2	size0	size0	0.1999
448	1.35	01::04:35:36 (2:2:1)	2	2	size0	size0	0.1999
449	1.35	01::04:35:36 (2:2:1)	2	2	size0	size0	0.1999
450	1.35	01::04:35:36 (2:2:1)	4	2	size0	size1	0.3999
451	1.35	01::04:35:36 (2:2:1)	2	2	size0	size0	0.1999
452	1.35	01::04:35:36 (2:2:1)	0	2	size0	size0	-0.0001
453	1.35	01::04:35:36 (2:2:1)	0	2	size0	size0	-0.0001
454	1.35	01::04:35:36 (2:2:1)	0	2	size0	size0	-0.0001
455	1.35	01::04:35:36 (2:2:1)	0	2	size0	size0	-0.0001
456	1.35	01::04:35:36 (2:2:1)	0	2	size0	size0	-0.0001
457	1.35	01::04:35:36 (2:2:1)	0	2	size0	size0	-0.0001
458	2.45	01::04:35:36 (2:2:1)	7	2	size1	size2	0.6999
459	2.45	01::04:35:36 (2:2:1)	3	2	size1	size0	0.2999
460	2.45	01::04:35:36 (2:2:1)	1	2	size1	size0	0.0999
461	2.45	01::04:35:36 (2:2:1)	6	2	size1	size1	0.5999
462	2.45	01::04:35:36 (2:2:1)	4	2	size1	size1	0.3999
463	2.45	01::04:35:36 (2:2:1)	5	2	size1	size1	0.4999
464	3.5	01::04:35:36 (2:2:1)	9	2	size2	size2	0.8999
465	3.5	01::04:35:36 (2:2:1)	7	2	size2	size2	0.6999
466	3.5	01::04:35:36 (2:2:1)	5	2	size2	size1	0.4999
467	3.5	01::04:35:36 (2:2:1)	6	2	size2	size1	0.5999
468	3.5	01::04:35:36 (2:2:1)	7	2	size2	size2	0.6999
469	3.5	01::04:35:36 (2:2:1)	7	2	size2	size2	0.6999
470	3.5	01::04:35:36 (2:2:1)	9.9	2	size2	size2	0.9899
471	3.5	01::04:35:36 (2:2:1)	4	2	size2	size1	0.3999
472	3.5	01::04:35:36 (2:2:1)	5	2	size2	size1	0.4999
473	3.5	01::04:35:36 (2:2:1)	6	2	size2	size1	0.5999
474	3.5	01::04:35:36 (2:2:1)	4	2	size2	size1	0.3999
475	3.5	01::04:35:36 (2:2:1)	6	2	size2	size1	0.5999
476	3.5	01::04:35:36 (2:2:1)	5	2	size2	size1	0.4999
520	1.32	06::03:35 (1:1)	0	2	size0	size0	-0.0001
521	1.32	06::03:35 (1:1)	0	2	size0	size0	-0.0001
522	1.32	06::03:35 (1:1)	0	2	size0	size0	-0.0001
523	1.32	06::03:35 (1:1)	1	2	size0	size0	0.0999
524	1.32	06::03:35 (1:1)	1	2	size0	size0	0.0999
525	1.32	06::03:35 (1:1)	1	2	size0	size0	0.0999
526	4	06::03:35 (1:1)	6	2	size2	size1	0.5999
527	4	06::03:35 (1:1)	7	2	size2	size2	0.6999
528	4	06::03:35 (1:1)	9	2	size2	size2	0.8999
529	4	06::03:35 (1:1)	9	2	size2	size2	0.8999
530	4	06::03:35 (1:1)	9.9	2	size2	size2	0.9899
531	4	06::03:35 (1:1)	0	2	size2	size0	-0.0001
532	2.66	06::03:35 (1:1)	6	2	size1	size1	0.5999
533	2.66	06::03:35 (1:1)	8	2	size1	size2	0.7999
534	2.66	06::03:35 (1:1)	4	2	size1	size1	0.3999
535	2.66	06::03:35 (1:1)	2	2	size1	size0	0.1999
536	2.66	06::03:35 (1:1)	3	2	size1	size0	0.2999
537	2.66	06::03:35 (1:1)	6	2	size1	size1	0.5999
538	2.66	06::03:35 (1:1)	6	2	size1	size1	0.5999
539	2.66	06::03:35 (1:1)	3	2	size1	size0	0.2999
540	2.66	06::03:35 (1:1)	5	2	size1	size1	0.4999
541	2.66	06::03:35 (1:1)	4	2	size1	size1	0.3999
542	2.66	06::03:35 (1:1)	5	2	size1	size1	0.4999
578	1	01::02:33:34 (2:1:1)	3	2	size0	size0	0.333222222
579	1	01::02:33:34 (2:1:1)	0	2	size0	size0	-0.000111111
580	1	01::02:33:34 (2:1:1)	0	2	size0	size0	-0.000111111
581	1	01::02:33:34 (2:1:1)	0	2	size0	size0	-0.000111111
582	1	01::02:33:34 (2:1:1)	0	2	size0	size0	-0.000111111
583	1	01::02:33:34 (2:1:1)	0	2	size0	size0	-0.000111111
584	3.08	01::02:33:34 (2:1:1)	5	2	size1	size1	0.555444444
585	3.08	01::02:33:34 (2:1:1)	1	2	size1	size0	0.111
586	3.08	01::02:33:34 (2:1:1)	4	2	size1	size1	0.444333333
587	3.08	01::02:33:34 (2:1:1)	5	2	size1	size1	0.555444444
588	3.08	01::02:33:34 (2:1:1)	4	2	size1	size1	0.444333333
589	3.08	01::02:33:34 (2:1:1)	3	2	size1	size0	0.333222222
590	5	01::02:33:34 (2:1:1)	8	2	size2	size2	0.888777778
591	5	01::02:33:34 (2:1:1)	8.9	2	size2	size2	0.988777778
592	5	01::02:33:34 (2:1:1)	8.9	2	size2	size2	0.988777778
593	5	01::02:33:34 (2:1:1)	3	2	size2	size0	0.333222222
594	5	01::02:33:34 (2:1:1)	6	2	size2	size1	0.666555556
595	5	01::02:33:34 (2:1:1)	5	2	size2	size1	0.555444444
626	2.25	Unipolar: 24	0	4	size0	size0	-0.000166667
627	2.25	Unipolar: 24	0	4	size0	size0	-0.000166667
628	2.25	Unipolar: 24	0	4	size0	size0	-0.000166667
629	2.25	Unipolar: 24	1	4	size0	size0	0.1665
630	2.25	Unipolar: 24	0	4	size0	size0	-0.000166667
631	2.25	Unipolar: 24	0	4	size0	size0	-0.000166667
632	6	Unipolar: 24	5	4	size2	size2	0.833166667
633	6	Unipolar: 24	5.9	4	size2	size2	0.983166667
634	6	Unipolar: 24	5.9	4	size2	size2	0.983166667
635	6	Unipolar: 24	5	4	size2	size2	0.833166667
636	6	Unipolar: 24	5	4	size2	size2	0.833166667
637	6	Unipolar: 24	5	4	size2	size2	0.833166667
638	3.75	Unipolar: 24	4	4	size1	size1	0.6665
639	3.75	Unipolar: 24	4	4	size1	size1	0.6665
640	3.75	Unipolar: 24	4	4	size1	size1	0.6665
641	3.75	Unipolar: 24	4	4	size1	size1	0.6665
642	3.75	Unipolar: 24	4	4	size1	size1	0.6665
643	3.75	Unipolar: 24	4	4	size1	size1	0.6665
674	3.75	Unipolar: 25	5	4	size1	size2	0.666666667
675	3.75	Unipolar: 25	5	4	size1	size2	0.666666667
676	3.75	Unipolar: 25	5	4	size1	size2	0.666666667
677	3.75	Unipolar: 25	5	4	size1	size2	0.666666667
678	3.75	Unipolar: 25	5	4	size1	size2	0.666666667
679	3.75	Unipolar: 25	5	4	size1	size2	0.666666667
680	3.75	Unipolar: 25	5	4	size1	size2	0.666666667
681	3.75	Unipolar: 25	4	4	size1	size1	0.5
682	3.75	Unipolar: 25	3	4	size1	size1	0.333333333
683	3.75	Unipolar: 25	5	4	size1	size2	0.666666667
684	3.75	Unipolar: 25	4	4	size1	size1	0.5
685	3.75	Unipolar: 25	4	4	size1	size1	0.5
686	6	Unipolar: 25	5.9	4	size2	size2	0.816666667
687	6	Unipolar: 25	5.9	4	size2	size2	0.816666667
688	6	Unipolar: 25	5.9	4	size2	size2	0.816666667
689	6	Unipolar: 25	5.9	4	size2	size2	0.816666667
690	6	Unipolar: 25	5.9	4	size2	size2	0.816666667
691	6	Unipolar: 25	5.9	4	size2	size2	0.816666667
692	6	Unipolar: 25	5.9	4	size2	size2	0.816666667
693	6	Unipolar: 25	5.9	4	size2	size2	0.816666667
694	6	Unipolar: 25	5.9	4	size2	size2	0.816666667
695	6	Unipolar: 25	5.9	4	size2	size2	0.816666667
696	6	Unipolar: 25	5.9	4	size2	size2	0.816666667
697	6	Unipolar: 25	5.9	4	size2	size2	0.816666667
698	2.25	Unipolar: 25	1	4	size0	size0	0
699	2.25	Unipolar: 25	2	4	size0	size0	0.166666667
700	2.25	Unipolar: 25	3	4	size0	size1	0.333333333
701	2.25	Unipolar: 25	3	4	size0	size1	0.333333333
702	2.25	Unipolar: 25	2	4	size0	size0	0.166666667
703	2.25	Unipolar: 25	1	4	size0	size0	0
704	2.25	Unipolar: 25	2	4	size0	size0	0.166666667
705	2.25	Unipolar: 25	2	4	size0	size0	0.166666667
706	2.25	Unipolar: 25	1	4	size0	size0	0
707	2.25	Unipolar: 25	2	4	size0	size0	0.166666667
708	2.25	Unipolar: 25	2	4	size0	size0	0.166666667
709	2.25	Unipolar: 25	2	4	size0	size0	0.166666667
770	4.5	Unipolar: 21	4	4	size1	size1	0.6665
771	4.5	Unipolar: 21	4	4	size1	size1	0.6665
772	4.5	Unipolar: 21	5	4	size1	size2	0.833166667
773	4.5	Unipolar: 21	5	4	size1	size2	0.833166667
774	4.5	Unipolar: 21	5	4	size1	size2	0.833166667
775	4.5	Unipolar: 21	5	4	size1	size2	0.833166667
776	2.25	Unipolar: 21	0	4	size0	size0	-0.000166667
777	2.25	Unipolar: 21	1	4	size0	size0	0.1665
778	2.25	Unipolar: 21	1	4	size0	size0	0.1665
779	2.25	Unipolar: 21	0	4	size0	size0	-0.000166667
780	2.25	Unipolar: 21	1	4	size0	size0	0.1665
781	2.25	Unipolar: 21	0	4	size0	size0	-0.000166667
782	6	Unipolar: 21	5	4	size2	size2	0.833166667
783	6	Unipolar: 21	5.9	4	size2	size2	0.983166667
784	6	Unipolar: 21	5.9	4	size2	size2	0.983166667
785	6	Unipolar: 21	5.9	4	size2	size2	0.983166667
786	6	Unipolar: 21	5.9	4	size2	size2	0.983166667
787	6	Unipolar: 21	5.9	4	size2	size2	0.983166667
818	3.75	Unipolar: 05	5	4	size1	size2	0.666666667
819	3.75	Unipolar: 05	5	4	size1	size2	0.666666667
820	3.75	Unipolar: 05	5	4	size1	size2	0.666666667
821	3.75	Unipolar: 05	5	4	size1	size2	0.666666667
822	3.75	Unipolar: 05	5	4	size1	size2	0.666666667
823	3.75	Unipolar: 05	5	4	size1	size2	0.666666667
824	2.25	Unipolar: 05	1	4	size0	size0	0
825	2.25	Unipolar: 05	1	4	size0	size0	0
826	2.25	Unipolar: 05	1	4	size0	size0	0
827	2.25	Unipolar: 05	1	4	size0	size0	0
828	2.25	Unipolar: 05	1	4	size0	size0	0
829	2.25	Unipolar: 05	1	4	size0	size0	0
830	6	Unipolar: 05	5.9	4	size2	size2	0.816666667
831	6	Unipolar: 05	5.9	4	size2	size2	0.816666667
832	6	Unipolar: 05	5	4	size2	size2	0.666666667
833	6	Unipolar: 05	5.9	4	size2	size2	0.816666667
834	6	Unipolar: 05	5.9	4	size2	size2	0.816666667
835	6	Unipolar: 05	5.9	4	size2	size2	0.816666667
872	2.25	Unipolar: 08	0	4	size0	size0	-0.000166667
873	2.25	Unipolar: 08	0	4	size0	size0	-0.000166667
874	2.25	Unipolar: 08	0	4	size0	size0	-0.000166667
875	2.25	Unipolar: 08	0	4	size0	size0	-0.000166667
876	2.25	Unipolar: 08	0	4	size0	size0	-0.000166667
877	2.25	Unipolar: 08	0	4	size0	size0	-0.000166667
878	6	Unipolar: 08	4	4	size2	size1	0.6665
879	6	Unipolar: 08	5	4	size2	size2	0.833166667
880	6	Unipolar: 08	5	4	size2	size2	0.833166667
881	6	Unipolar: 08	5	4	size2	size2	0.833166667
882	6	Unipolar: 08	5	4	size2	size2	0.833166667
883	6	Unipolar: 08	5.9	4	size2	size2	0.983166667
884	3.75	Unipolar: 08	1	4	size1	size0	0.1665
885	3.75	Unipolar: 08	2	4	size1	size0	0.333166667
886	3.75	Unipolar: 08	3	4	size1	size1	0.499833333
887	3.75	Unipolar: 08	3	4	size1	size1	0.499833333
888	3.75	Unipolar: 08	4	4	size1	size1	0.6665
889	3.75	Unipolar: 08	3	4	size1	size1	0.499833333
