# Supplementary material for: Sensory restoration by epidural stimulation of the lateral spinal cord in upper-limb amputees
Source: eLife. 2020 Jul 21;9:e54349. doi: 10.7554/eLife.54349 (PMC7373432; doi:10.7554/eLife.54349)
Supplement: Figure 5—source data 1. [file elife-54349-fig5-data1.csv]

	elecrode	slope	subject	type
0	0	0.37	1	int
1	0	-2.191014199	1	area
2	1	1.07	1	int
3	1	0.061603439	1	area
4	2	1.7	1	int
5	2	0.240427784	1	area
6	0	1.2	2	int
7	0	-0.209640972	2	area
8	1	3.18	2	int
9	1	0.019904167	2	area
10	2	2.36	2	int
11	2	-0.497571797	2	area
12	3	2.21	2	int
13	3		2	area
14	4	2.74	2	int
15	4	-0.016059022	2	area
16	0	0.94	3	int
17	0		3	area
18	1	1.33	3	int
19	1	-0.002075737	3	area
20	2	1.27	3	int
21	2	-0.071683004	3	area
22	4	1.22	3	int
23	4	0.01453647	3	area
24	5	1.18	3	int
25	5	-0.082495857	3	area
26	6	1.58	3	int
27	6	0.089188307	3	area
28	7	1.39	3	int
29	7	0.571437115	3	area
30	8	1.43	3	int
31	8	-0.021900425	3	area
32	3	1.37	4	int
33	3	0.181150642	4	area
34	4	1.39	4	int
35	4	0.079500742	4	area
36	5	1.33	4	int
37	5	0.240119998	4	area
38	7	1.49	4	int
39	7	0.062559904	4	area
40	8	1.32	4	int
41	8	-0.002933905	4	area
42	9	1.29	4	int
43	9	0.137314361	4	area
44	10	1.32	4	int
45	10	0.136238676	4	area
46	15	1.36	4	int
47	15	0.252179226	4	area
