# Supplementary material for: Sensory restoration by epidural stimulation of the lateral spinal cord in upper-limb amputees
Source: eLife. 2020 Jul 21;9:e54349. doi: 10.7554/eLife.54349 (PMC7373432; doi:10.7554/eLife.54349)
Supplement: Figure 7—source data 1. [file elife-54349-fig7-data1.csv]

	elecrode	threshold charge (nC)	week	subject
0	12::15 (1)	4384	2	1
1	11::14 (1)	2800	2	1
2	12::15 (1)	4000	2	1
3	11::14 (1)	3200	3	1
4	12::15 (1)	4000	3	1
5	11::14 (1)	3200	3	1
6	12::15 (1)	3600	3	1
7	12::15 (1)	4000	3	1
8	11::14 (1)	4800	3	1
9	12::15 (1)	4800	3	1
10	12::15 (1)	3200	4	1
11	11::14 (1)	3200	4	1
12	12::15 (1)	1500	4	1
13	11::14 (1)	2800	4	1
14	12::15 (1)	3584	1	1
15	11::14 (1)	2000	1	1
16	12::15 (1)	4000	1	1
17	01::02:33:34 (2:1:1)	400	1	2
18	01::02:33:34 (2:1:1)	174	1	2
19	01::04:35:36 (2:2:1)	765	1	2
20	01::04:35:36 (2:2:1)	700	1	2
21	05::04:36:37 (1:1:1)	600	1	2
22	05::04:36:37 (2:1:1)	800	1	2
23	01::02:33:34 (2:1:1)	600	1	2
24	01::04:35:36 (2:2:1)	800	2	2
25	06::03:35 (1:1)	800	1	2
26	05::04:36:37 (2:1:1)	800	2	2
27	01::02:33:34 (2:1:1)	800	2	2
28	01::04:35:36 (2:2:1)	800	2	2
29	01::02:33:34 (2:1:1)	896	2	2
30	06::03:35 (1:1)	500	2	2
31	01::04:35:36 (2:2:1)	700	2	2
32	06::03:35 (1:1)	700	2	2
33	01::02:33:34 (2:1:1)	696	2	2
34	01::02:33:34 (2:1:1)	600	2	2
35	01::04:35:36 (2:2:1)	800	2	2
36	06::03:35 (1:1)	300	2	2
37	05::04:36:37 (1:1:1)	600	2	2
38	05::07:08 (1:1)	500	1	3
39	Unipolar: 06	1000	1	3
40	Unipolar: 04	220	1	3
41	Unipolar: 05	300	1	3
42	05::04:06 (1:1)	600	1	3
43	Unipolar: 07	1000	1	3
44	Unipolar: 06	480	1	3
45	Unipolar: 04	600	1	3
46	Unipolar: 05	500	1	3
47	Unipolar: 05	800	1	3
48	05::06 (1)	800	1	3
49	Unipolar: 05	700	2	3
50	Unipolar: 04	600	2	3
51	Unipolar: 05	600	2	3
52	Unipolar: 06	800	2	3
53	Unipolar: 05	1000	2	3
54	05::06 (1)	1000	2	3
55	Unipolar: 05	800	2	3
56	05::06:07 (1:1)	900	2	3
57	05::04:06 (1:1)	1096	2	3
58	05::07:08 (1:1)	800	2	3
59	05::06 (1)	1000	2	3
60	Unipolar: 04	1200	3	3
61	05::07:08 (1:1)	1000	3	3
62	05::07:08 (1:1)	1000	3	3
63	Unipolar: 07	800	3	3
64	Unipolar: 05	1000	3	3
65	05::06 (1)	800	3	3
66	Unipolar: 06	500	3	3
67	Unipolar: 07	500	3	3
68	05::06:07 (1:1)	1275	3	3
69	05::07:08 (1:1)	1275	3	3
70	05::06 (1)	1275	3	3
71	Unipolar: 04	2500	3	3
72	Unipolar: 05	2000	3	3
73	05::06 (1)	800	3	3
74	05::07:08 (1:1)	600	3	3
75	Unipolar: 07	600	3	3
76	Unipolar: 05	600	3	3
77	05::06:07 (1:1)	600	3	3
78	05::04:06 (1:1)	1000	3	3
79	Unipolar: 06	400	4	3
80	05::06 (1)	600	4	3
81	Unipolar: 07	400	4	3
82	05::07:08 (1:1)	600	4	3
83	05::06:07 (1:1)	600	4	3
84	Unipolar: 05	400	4	3
85	Unipolar: 04	400	4	3
86	05::04:06 (1:1)	600	4	3
87	05::04:06 (1:1)	3775	4	3
88	05::07:08 (1:1)	2265	4	3
89	Unipolar: 05	1200	4	3
90	Unipolar: 07	1200	4	3
91	05::06:07 (1:1)	2000	4	3
92	05::06 (1)	1500	4	3
93	05::07:08 (1:1)	800	4	3
94	Unipolar: 06	1200	4	3
95	05::06 (1)	1000	4	3
96	Unipolar: 07	800	4	3
97	05::04:06 (1:1)	1000	4	3
98	05::06:07 (1:1)	1000	4	3
99	05::06:07 (1:1)	1200	4	3
100	05::06 (1)	1000	4	3
101	05::07:08 (1:1)	600	4	3
102	Unipolar: 07	600	4	3
103	Unipolar: 06	1200	4	3
104	05::06 (1)	1200	4	3
105	05::06:07 (1:1)	600	4	3
106	05::04:06 (1:1)	1000	4	3
107	05::07:08 (1:1)	600	4	3
108	Unipolar: 07	600	4	4
109	Unipolar: 22	600	4	4
110	Unipolar: 05	600	4	4
111	Unipolar: 21	600	4	4
112	Unipolar: 25	600	4	4
113	Unipolar: 24	600	4	4
114	Unipolar: 06	600	4	4
115	Unipolar: 23	600	4	4
116	Unipolar: 08	600	4	4
117	Unipolar: 08	600	4	4
118	Unipolar: 25	800	4	4
119	Unipolar: 21	600	4	4
120	Unipolar: 05	600	4	4
121	Unipolar: 23	600	4	4
122	Unipolar: 07	600	4	4
123	Unipolar: 06	600	4	4
124	Unipolar: 23	500	1	4
125	Unipolar: 07	600	1	4
126	Unipolar: 22	500	1	4
127	Unipolar: 24	500	1	4
128	Unipolar: 06	500	1	4
129	Unipolar: 09	600	1	4
130	Unipolar: 08	600	1	4
131	Unipolar: 11	500	1	4
132	Unipolar: 24	600	1	4
133	Unipolar: 05	500	1	4
134	Unipolar: 08	500	1	4
135	Unipolar: 07	500	1	4
136	Unipolar: 25	400	1	4
137	Unipolar: 23	600	1	4
138	Unipolar: 09	500	1	4
139	Unipolar: 21	600	1	4
140	Unipolar: 22	600	1	4
141	Unipolar: 11	400	1	4
142	Unipolar: 06	400	1	4
143	Unipolar: 09	300	1	4
144	Unipolar: 07	600	1	4
145	Unipolar: 22	600	1	4
146	Unipolar: 24	600	1	4
147	Unipolar: 25	600	1	4
148	Unipolar: 21	600	1	4
149	Unipolar: 06	600	1	4
150	Unipolar: 23	600	1	4
151	Unipolar: 08	300	1	4
152	Unipolar: 05	300	1	4
153	Unipolar: 06	600	1	4
154	Unipolar: 05	600	1	4
155	Unipolar: 08	600	1	4
156	Unipolar: 25	600	1	4
157	Unipolar: 11	600	1	4
158	Unipolar: 09	600	1	4
159	Unipolar: 07	600	1	4
160	Unipolar: 23	600	1	4
161	Unipolar: 21	600	1	4
162	Unipolar: 22	600	1	4
163	Unipolar: 24	600	1	4
164	Unipolar: 22	400	1	4
165	Unipolar: 24	400	1	4
166	Unipolar: 05	400	1	4
167	Unipolar: 07	400	1	4
168	Unipolar: 09	300	1	4
169	Unipolar: 23	400	1	4
170	Unipolar: 25	400	1	4
171	Unipolar: 06	600	1	4
172	Unipolar: 08	300	1	4
173	Unipolar: 11	400	1	4
174	Unipolar: 21	400	1	4
175	Unipolar: 21	600	2	4
176	Unipolar: 05	600	2	4
177	Unipolar: 06	600	2	4
178	Unipolar: 11	1000	2	4
179	Unipolar: 08	600	2	4
180	Unipolar: 25	600	2	4
181	Unipolar: 24	600	2	4
182	Unipolar: 09	600	2	4
183	Unipolar: 07	600	2	4
184	Unipolar: 22	600	2	4
185	Unipolar: 23	600	2	4
186	Unipolar: 24	600	2	4
187	Unipolar: 08	600	2	4
188	Unipolar: 22	600	2	4
189	Unipolar: 23	600	2	4
190	Unipolar: 06	400	2	4
191	Unipolar: 09	400	2	4
192	Unipolar: 05	400	2	4
193	Unipolar: 07	600	2	4
194	Unipolar: 21	600	2	4
195	Unipolar: 11	1000	2	4
196	Unipolar: 25	600	2	4
197	Unipolar: 21	600	2	4
198	Unipolar: 25	600	2	4
199	Unipolar: 23	600	2	4
200	Unipolar: 05	600	2	4
201	Unipolar: 06	600	2	4
202	Unipolar: 08	600	2	4
203	Unipolar: 07	600	2	4
204	Unipolar: 25	600	2	4
205	Unipolar: 24	600	2	4
206	Unipolar: 21	600	2	4
207	Unipolar: 05	600	2	4
208	Unipolar: 07	600	2	4
209	Unipolar: 22	600	2	4
210	Unipolar: 06	600	2	4
211	Unipolar: 23	600	2	4
212	Unipolar: 08	600	2	4
213	Unipolar: 25	600	3	4
214	Unipolar: 22	600	3	4
215	Unipolar: 07	600	3	4
216	Unipolar: 23	1000	3	4
217	Unipolar: 05	600	3	4
218	Unipolar: 21	600	3	4
219	Unipolar: 08	600	3	4
220	Unipolar: 06	600	3	4
221	Unipolar: 24	800	3	4
222	Unipolar: 23	600	3	4
223	Unipolar: 22	600	3	4
224	Unipolar: 05	600	3	4
225	Unipolar: 21	600	3	4
226	Unipolar: 07	600	3	4
227	Unipolar: 24	600	3	4
228	Unipolar: 25	600	3	4
229	Unipolar: 06	600	3	4
230	Unipolar: 08	600	3	4
231	Unipolar: 08	600	3	4
232	Unipolar: 25	600	3	4
233	Unipolar: 06	600	3	4
234	Unipolar: 21	600	3	4
235	Unipolar: 05	600	3	4
236	Unipolar: 07	600	3	4
237	Unipolar: 23	600	3	4
238	Unipolar: 24	600	3	4
239	Unipolar: 07	600	3	4
240	Unipolar: 08	600	3	4
241	Unipolar: 25	600	3	4
242	Unipolar: 11	600	3	4
243	Unipolar: 09	600	3	4
244	Unipolar: 06	600	3	4
245	Unipolar: 05	600	3	4
246	Unipolar: 22	600	3	4
247	Unipolar: 23	600	3	4
248	Unipolar: 21	600	3	4
249	Unipolar: 24	600	4	4
250	Unipolar: 07	600	4	4
251	Unipolar: 23	150	4	4
252	Unipolar: 05	300	4	4
253	Unipolar: 08	150	4	4
254	Unipolar: 06	300	4	4
255	Unipolar: 22	600	4	4
256	Unipolar: 25	300	4	4
257	Unipolar: 21	300	4	4
258	Unipolar: 21	600	4	4
259	Unipolar: 08	600	4	4
260	Unipolar: 25	600	4	4
261	Unipolar: 05	600	4	4
