# Supplementary material for: Sensory restoration by epidural stimulation of the lateral spinal cord in upper-limb amputees
Source: eLife. 2020 Jul 21;9:e54349. doi: 10.7554/eLife.54349 (PMC7373432; doi:10.7554/eLife.54349)
Supplement: Figure 7—source data 2. [file elife-54349-fig7-data2.csv]

centroidDist(cm)	electrode	comparisonWeeks	subject
0.6022161475224415	05::06:09 (1:1)	2-3	1
2.126388074558926	11::14 (1)	1-2	1
1.429527375071471	11::14 (1)	2-3	1
0.5344116652721399	11::14 (1)	3-4	1
0.2136269313928138	12::15 (1)	1-2	1
0.3614236996907736	12::15 (1)	2-3	1
1.3402192087916514	12::15 (1)	3-4	1
0.5646277264817211	06::03:35 (1:1)	1-2	2
5.300075760715971	01::04:35:36 (2:2:1)	1-2	2
4.359500670121492	05::04:36:37 (2:1:1)	1-2	2
2.4883611680504507	05::04:36:37 (1:1:1)	1-2	2
4.498519531734741	01::02:33:34 (2:1:1)	1-2	2
0.4417839339630176	05::04:06 (1:1)	2-3	3
0.6826416108730616	05::04:06 (1:1)	3-4	3
0.8885933187999095	05::06:07 (1:1)	2-3	3
0.7906324647004366	05::06:07 (1:1)	3-4	3
2.4086855839116508	05::06 (1)	1-2	3
1.3653258256103435	05::06 (1)	2-3	3
0.6427403644749814	05::06 (1)	3-4	3
2.5637273748951874	Unipolar: 04	1-2	3
3.571087454136765	Unipolar: 06	1-2	3
0.993115467455173	Unipolar: 07	3-4	3
0.16224811285078283	05::07:08 (1:1)	2-3	3
1.6872279496056362	05::07:08 (1:1)	3-4	3
3.602477035243512	05::04:21:22:23 (1:1:1:2)	2-3	3
2.036178039131161	Unipolar: 05	1-2	3
1.7937110649510022	Unipolar: 05	2-3	3
1.8135451616684801	Unipolar: 05	3-4	3
1.1320168143648541	Unipolar: 28	1-2	4
5.77363689890228	Unipolar: 27	1-2	4
7.063491804293593	Unipolar: 12	1-2	4
6.214203402127031	Unipolar: 24	1-2	4
3.7976624505945176	Unipolar: 24	2-3	4
4.4177337418720555	Unipolar: 24	3-4	4
2.5659122799679093	Unipolar: 07	1-2	4
1.5291977627649302	Unipolar: 07	2-3	4
5.020728740384387	Unipolar: 07	3-4	4
2.0063651120731816	Unipolar: 06	1-2	4
0.5326763127745708	Unipolar: 06	2-3	4
3.5326681187230244	Unipolar: 06	3-4	4
1.868488669108655	Unipolar: 22	1-2	4
0.8863990601598577	Unipolar: 22	2-3	4
3.925301909322139	Unipolar: 22	3-4	4
1.4458536961149446	Unipolar: 21	1-2	4
0.22328607127685202	Unipolar: 21	2-3	4
0.8249237081259363	Unipolar: 21	3-4	4
3.113463933523402	Unipolar: 08	1-2	4
2.2851415043237373	Unipolar: 08	2-3	4
1.4350398396417616	Unipolar: 08	3-4	4
3.7735268892556872	Unipolar: 25	1-2	4
1.1591309662310374	Unipolar: 25	2-3	4
0.7603986678182201	Unipolar: 25	3-4	4
2.102731544370398	Unipolar: 23	1-2	4
6.04660344831502	Unipolar: 23	2-3	4
0.27675634592983506	Unipolar: 23	3-4	4
1.2530567684384537	Unipolar: 26	1-2	4
4.026058115970465	Unipolar: 09	1-2	4
1.827828719548501	Unipolar: 09	2-3	4
6.096035133602682	Unipolar: 10	1-2	4
1.1337839191713293	Unipolar: 05	1-2	4
0.4586086206412586	Unipolar: 05	2-3	4
0.35222974955398295	Unipolar: 05	3-4	4
