# Supplementary material for: Sensory restoration by epidural stimulation of the lateral spinal cord in upper-limb amputees
Source: eLife. 2020 Jul 21;9:e54349. doi: 10.7554/eLife.54349 (PMC7373432; doi:10.7554/eLife.54349)
Supplement: Figure 7—source data 3. [file elife-54349-fig7-data3.csv]

areaChange	electrode	comparisonWeeks	subject
-10.744253934347148	05::06:09 (1:1)	2-3	1
8.031670918960906	11::14 (1)	1-2	1
-9.221780851710644	11::14 (1)	2-3	1
-2.9359109031057304	11::14 (1)	3-4	1
-8.968191634346955	12::15 (1)	1-2	1
-2.7332864394062737	12::15 (1)	2-3	1
-0.1244636775845942	12::15 (1)	3-4	1
-1.7203267115344119	06::03:35 (1:1)	1-2	2
59.85646899635036	01::04:35:36 (2:2:1)	1-2	2
37.93782806398622	05::04:36:37 (2:1:1)	1-2	2
-4.750028726857231	05::04:36:37 (1:1:1)	1-2	2
54.27054632680468	01::02:33:34 (2:1:1)	1-2	2
6.17375980498754	05::04:06 (1:1)	2-3	3
-13.549092578314315	05::04:06 (1:1)	3-4	3
0.1157552466544658	05::06:07 (1:1)	2-3	3
-21.6736868765037	05::06:07 (1:1)	3-4	3
-9.27142584352206	05::06 (1)	1-2	3
31.30637402994165	05::06 (1)	2-3	3
-35.566745846838344	05::06 (1)	3-4	3
19.496644273007377	Unipolar: 04	1-2	3
4.567486763013132	Unipolar: 06	1-2	3
0.43781796338308965	Unipolar: 07	3-4	3
6.254241199943401	05::07:08 (1:1)	2-3	3
-14.650404596933967	05::07:08 (1:1)	3-4	3
-3.1492987135145185	05::04:21:22:23 (1:1:1:2)	2-3	3
3.556729292932154	Unipolar: 05	1-2	3
-11.115399305441407	Unipolar: 05	2-3	3
1.5953383327574215	Unipolar: 05	3-4	3
35.39760054052791	Unipolar: 28	1-2	4
-38.55968092508892	Unipolar: 27	1-2	4
-53.91496466198431	Unipolar: 12	1-2	4
-10.670763765043478	Unipolar: 24	1-2	4
-0.8788322275809888	Unipolar: 24	2-3	4
1.0728557596832253	Unipolar: 24	3-4	4
-14.633675017925178	Unipolar: 07	1-2	4
3.9232166038364893	Unipolar: 07	2-3	4
3.3092863586948535	Unipolar: 07	3-4	4
-9.05614704626755	Unipolar: 06	1-2	4
1.3344692891373988	Unipolar: 06	2-3	4
6.862493588756716	Unipolar: 06	3-4	4
-9.046805407485163	Unipolar: 22	1-2	4
5.193663519445604	Unipolar: 22	2-3	4
3.5289227104090397	Unipolar: 22	3-4	4
-9.01422053771	Unipolar: 21	1-2	4
0.4492787115637631	Unipolar: 21	2-3	4
4.225716575710382	Unipolar: 21	3-4	4
-9.53404086067015	Unipolar: 08	1-2	4
-20.778656127657513	Unipolar: 08	2-3	4
7.889077775614075	Unipolar: 08	3-4	4
-25.345320538039328	Unipolar: 25	1-2	4
0.14623838314377835	Unipolar: 25	2-3	4
7.816110573863522	Unipolar: 25	3-4	4
-19.27477282955383	Unipolar: 23	1-2	4
3.7495240967327534	Unipolar: 23	2-3	4
0.4422420930916804	Unipolar: 23	3-4	4
10.231133297625313	Unipolar: 26	1-2	4
-37.16616260534917	Unipolar: 09	1-2	4
-13.47982324350139	Unipolar: 09	2-3	4
-0.7265406643896162	Unipolar: 10	1-2	4
-7.234599701685904	Unipolar: 05	1-2	4
1.337475502881615	Unipolar: 05	2-3	4
3.2971436123964475	Unipolar: 05	3-4	4
